# Supplementary material
Source: HighWire-hosted journal article supplement (https://emj.bmj.com/content/38/2/88)

**Supplemental Table S1: Characteristics of the PRIEST cohort and the cohort included in this analysis**

| Characteristic                           | All<br>(n=22445)   | With post-exertion<br>oxygen saturation<br>(n=817) |
|------------------------------------------|--------------------|----------------------------------------------------|
| <b>Sex</b>                               |                    |                                                    |
| Male                                     | 11034 (49.2%)      | 369 (45.2%)                                        |
| Female                                   | 11200 (49.9%)      | 442 (54.1%)                                        |
| Missing                                  | 211 (0.9%)         | 6 (0.7%)                                           |
| <b>Ethnicity</b>                         |                    |                                                    |
| Uk\Irish\other white                     | 15198 (67.7%)      | 475 (58.1%)                                        |
| Asian                                    | 1150 (5.1%)        | 67 (8.2%)                                          |
| Black/African/Caribbean                  | 692 (3.1%)         | 47 (5.8%)                                          |
| Mixed/multiple ethnic groups             | 328 (1.5%)         | 18 (2.2%)                                          |
| Other                                    | 570 (2.5%)         | 47 (5.8%)                                          |
| Missing                                  | 4507 (20.1%)       | 163 (20.0%)                                        |
| <b>Performance status</b>                |                    |                                                    |
| Unrestricted normal activity             | 11917 (53.1%)      | 643 (78.7%)                                        |
| Limited strenuous activity, can do light | 2393 (10.7%)       | 83 (10.2%)                                         |
| Limited activity, can self care          | 2790 (12.4%)       | 36 (4.4%)                                          |
| Limited self care                        | 2662 (11.9%)       | 11 (1.3%)                                          |
| Bed/chair bound, no self care            | 1510 (6.7%)        | 0 (0.0%)                                           |
| Missing                                  | 1173 (5.2%)        | 44 (5.4%)                                          |
| <b>Age</b>                               |                    |                                                    |
| N (%)                                    | 22438 (100.0%)     | 817 (100.0%)                                       |
| Mean (SD)                                | 58.4 (24.2)        | 48.4 (16.1)                                        |
| Median (IQR)                             | 62.0 (43.0, 78.0)  | 47.0 (36.0, 59.0)                                  |
| <b>Respiratory rate</b>                  |                    |                                                    |
| N (%)                                    | 21843 (97.3%)      | 796 (97.4%)                                        |
| Mean (SD)                                | 23.9 (7.7)         | 20.8 (5.3)                                         |
| Median (IQR)                             | 22.0 (18.0, 28.0)  | 20.0 (18.0, 23.0)                                  |
| <b>Pulse Rate</b>                        |                    |                                                    |
| N (%)                                    | 21966 (97.9%)      | 809 (99.0%)                                        |
| Mean (SD)                                | 97.8 (24.5)        | 90.6 (18.1)                                        |
| Median (IQR)                             | 95.0 (81.0, 111.0) | 90.0 (78.0, 102.0)                                 |
| <b>Temperature</b>                       |                    |                                                    |
| N (%)                                    | 21740 (96.9%)      | 799 (97.8%)                                        |
| Mean (SD)                                | 37.2 (1.1)         | 37.0 (0.8)                                         |
| Median (IQR)                             | 37.0 (36.5, 37.9)  | 36.8 (36.5, 37.3)                                  |
| <b>Systolic BP</b>                       |                    |                                                    |
| N (%)                                    | 20697 (92.2%)      | 793 (97.1%)                                        |

|                            |              |                      |                      |
|----------------------------|--------------|----------------------|----------------------|
|                            | Mean (SD)    | 134.2 (25.0)         | 136.5 (21.3)         |
|                            | Median (IQR) | 132.0 (117.0, 149.0) | 134.0 (122.0, 148.0) |
| Diastolic BP               |              |                      |                      |
|                            | N (%)        | 20600 (91.8%)        | 788 (96.5%)          |
|                            | Mean (SD)    | 78.0 (16.2)          | 82.6 (12.9)          |
|                            | Median (IQR) | 78.0 (68.0, 88.0)    | 82.0 (74.5, 90.0)    |
| Oxygen saturation          |              |                      |                      |
|                            | N (%)        | 22154 (98.7%)        | 813 (99.5%)          |
|                            | Mean (SD)    | 94.9 (6.6)           | 97.0 (2.4)           |
|                            | Median (IQR) | 96.0 (94.0, 98.0)    | 97.0 (96.0, 99.0)    |
| Medical History            |              |                      |                      |
| No Chronic disease         |              | 7077 (31.5%)         | 406 (49.7%)          |
| Heart Disease              |              | 4723 (21.0%)         | 66 (8.1%)            |
| Renal impairment           |              | 1944 (8.7%)          | 27 (3.3%)            |
| Steroid therapy            |              | 564 (2.5%)           | 13 (1.6%)            |
| Asthma                     |              | 3492 (15.6%)         | 135 (16.5%)          |
| Diabetes                   |              | 4132 (18.4%)         | 73 (8.9%)            |
| Active malignancy          |              | 1124 (5.0%)          | 14 (1.7%)            |
| Immunosuppression          |              | 646 (2.9%)           | 30 (3.7%)            |
| Other chronic lung disease |              | 3795 (16.9%)         | 81 (9.9%)            |
| Hypertension               |              | 6439 (28.7%)         | 155 (19.0%)          |
| Medical history missing    |              | 1104 (4.9%)          | 50 (6.1%)            |
| Adverse outcome            |              |                      |                      |
| Any                        |              | 4638 (20.7%)         | 30 (3.7%)            |
| Death                      |              | 3251 (14.5%)         | 8 (1.0%)             |
| Respiratory support        |              | 1962 (8.7%)          | 22 (2.7%)            |
| Cardiovascular support     |              | 525 (2.3%)           | 5 (0.6%)             |
| Renal support              |              | 220 (1.0%)           | 4 (0.5%)             |

**Supplemental Table S2: Accuracy of baseline oxygen saturation at a range of thresholds for positivity, primary analysis (N=813)**

| Threshold | Sensitivity (95% CI) | Specificity (95% CI) | Positive likelihood ratio (95% CI) | Negative likelihood ratio (95% CI) |
|-----------|----------------------|----------------------|------------------------------------|------------------------------------|
| <=99      | 96.7 (82.8 to 99.9)  | 14.9 (12.5 to 17.6)  | 1.14 (1.06 to 1.23)                | 0.22 (0.03 to 1.52)                |
| <=98      | 90.0 (73.5 to 97.9)  | 28.6 (25.5 to 31.9)  | 1.26 (1.11 to 1.43)                | 0.35 (0.12 to 1.03)                |
| <=97      | 76.7 (57.7 to 90.1)  | 49.3 (45.7 to 52.9)  | 1.51 (1.23 to 1.86)                | 0.47 (0.24 to 0.90)                |
| <=96      | 70.0 (50.6 to 85.3)  | 66.2 (62.7 to 69.5)  | 2.07 (1.61 to 2.67)                | 0.45 (0.26 to 0.78)                |
| <=95      | 53.3 (34.3 to 71.7)  | 78.3 (75.2 to 81.1)  | 2.46 (1.72 to 3.53)                | 0.60 (0.41 to 0.88)                |
| <=94      | 43.3 (25.5 to 62.6)  | 88.5 (86.1 to 90.7)  | 3.77 (2.40 to 5.93)                | 0.64 (0.47 to 0.88)                |
| <=93      | 33.3 (17.3 to 52.8)  | 93.9 (92.0 to 95.4)  | 5.44 (3.06 to 9.67)                | 0.71 (0.55 to 0.92)                |
| <=92      | 30.0 (14.7 to 49.4)  | 95.5 (93.8 to 96.9)  | 6.71 (3.55 to 12.67)               | 0.73 (0.58 to 0.92)                |
| <=91      | 20.0 (7.7 to 38.6)   | 97.7 (96.4 to 98.6)  | 8.70 (3.72 to 20.33)               | 0.82 (0.69 to 0.98)                |
| <=90      | 16.7 (5.6 to 34.7)   | 98.5 (97.3 to 99.2)  | 10.87 (4.09 to 28.89)              | 0.85 (0.72 to 1.00)                |

**Supplemental Table S3: Accuracy of post-exertion oxygen saturation at a range of thresholds for positivity, primary analysis (N=817)**

| Threshold | Sensitivity (95% CI) | Specificity (95% CI) | Positive likelihood ratio (95% CI) | Negative likelihood ratio (95% CI) |
|-----------|----------------------|----------------------|------------------------------------|------------------------------------|
| <=99      | 100 (88.4 to 100)    | 9.8 (7.8 to 12.1)    | 1.11*                              | 0.00*                              |
| <=98      | 96.7 (82.8 to 99.9)  | 20.5 (17.7 to 23.4)  | 1.22 (1.13 to 1.32)                | 0.16 (0.02 to 1.10)                |
| <=97      | 93.3 (77.9 to 99.2)  | 36.7 (33.3 to 40.2)  | 1.47 (1.32 to 1.64)                | 0.18 (0.05 to 0.69)                |
| <=96      | 86.7 (69.3 to 96.2)  | 48.4 (44.9 to 52.0)  | 1.68 (1.44 to 1.96)                | 0.28 (0.11 to 0.70)                |
| <=95      | 66.7 (47.2 to 82.7)  | 58.2 (54.7 to 61.7)  | 1.59 (1.22 to 2.07)                | 0.57 (0.34 to 0.95)                |
| <=94      | 56.7 (37.4 to 74.5)  | 66.8 (63.4 to 70.1)  | 1.71 (1.23 to 2.37)                | 0.65 (0.43 to 0.98)                |
| <=93      | 56.7 (37.4 to 74.5)  | 73.4 (70.2 to 76.5)  | 2.13 (1.53 to 2.97)                | 0.59 (0.39 to 0.89)                |
| <=92      | 53.3 (34.3 to 71.7)  | 76.2 (73.1 to 79.2)  | 2.24 (1.57 to 3.20)                | 0.61 (0.42 to 0.90)                |
| <=91      | 43.3 (25.5 to 62.6)  | 81.4 (78.6 to 84.1)  | 2.34 (1.52 to 3.61)                | 0.70 (0.51 to 0.96)                |
| <=90      | 36.7 (19.9 to 56.1)  | 86.0 (83.4 to 88.4)  | 2.62 (1.59 to 4.32)                | 0.74 (0.56 to 0.97)                |

\*Unable to calculate confidence interval

**Table S4: Accuracy of baseline oxygen saturation at a range of thresholds for positivity, secondary analysis (N=652)**

| Threshold | Sensitivity (95% CI) | Specificity (95% CI) | Positive likelihood ratio (95% CI) | Negative likelihood ratio (95% CI) |
|-----------|----------------------|----------------------|------------------------------------|------------------------------------|
| <=99      | 93.8 (69.8 to 99.8)  | 15.1 (12.4 to 18.1)  | 1.10 (0.97 to 1.25)                | 0.41 (0.06 to 2.76)                |
| <=98      | 81.3 (54.4 to 96.0)  | 30.0 (26.5 to 33.8)  | 1.16 (0.91 to 1.48)                | 0.62 (0.22 to 1.73)                |
| <=97      | 68.8 (41.3 to 89.0)  | 52.8 (48.9 to 56.8)  | 1.46 (1.04 to 2.05)                | 0.59 (0.28 to 1.22)                |
| <=96      | 56.3 (29.9 to 80.2)  | 70.9 (67.2 to 74.4)  | 1.93 (1.23 to 3.02)                | 0.62 (0.35 to 1.08)                |
| <=95      | 25.0 (7.3 to 52.4)   | 84.3 (81.2 to 87.0)  | 1.59 (0.67 to 3.79)                | 0.89 (0.67 to 1.18)                |
| <=94      | 6.3 (0.2 to 30.2)    | 95.1 (93.2 to 96.7)  | 1.28 (0.19 to 8.81)                | 0.99 (0.87 to 1.12)                |

**Table S5: Accuracy of post-exertion oxygen saturation at a range of thresholds for positivity, secondary analysis**

| Threshold | Sensitivity (95% CI)  | Specificity (95% CI) | Positive likelihood ratio (95% CI) | Negative likelihood ratio (95% CI) |
|-----------|-----------------------|----------------------|------------------------------------|------------------------------------|
| <=99      | 100.0 (79.4 to 100.0) | 10.3 (8.1 to 13.0)   | 1.12*                              | 0.00*                              |
| <=98      | 93.8 (69.8 to 99.8)   | 21.8 (18.6 to 25.2)  | 1.20 (1.05 to 1.37)                | 0.29 (0.04 to 1.95)                |
| <=97      | 93.8 (69.8 to 99.8)   | 39.1 (35.3 to 43.0)  | 1.54 (1.34 to 1.77)                | 0.16 (0.02 to 1.07)                |
| <=96      | 93.8 (69.8 to 99.8)   | 52.1 (48.2 to 56.0)  | 1.96 (1.69 to 2.28)                | 0.12 (0.02 to 0.80)                |
| <=95      | 62.5 (35.4 to 84.8)   | 62.1 (58.2 to 65.9)  | 1.65 (1.11 to 2.44)                | 0.60 (0.32 to 1.13)                |
| <=94      | 50.0 (24.7 to 75.3)   | 71.2 (67.5 to 74.7)  | 1.74 (1.05 to 2.88)                | 0.70 (0.43 to 1.15)                |
| <=93      | 50.0 (24.7 to 75.3)   | 77.9 (74.5 to 81.1)  | 2.27 (1.36 to 3.78)                | 0.64 (0.39 to 1.05)                |
| <=92      | 50.0 (24.7 to 75.3)   | 80.9 (77.6 to 83.9)  | 2.62 (1.56 to 4.39)                | 0.62 (0.38 to 1.01)                |
| <=91      | 37.5 (15.2 to 64.6)   | 85.0 (82.0 to 87.7)  | 2.50 (1.29 to 4.83)                | 0.74 (0.51 to 1.08)                |
| <=90      | 37.5 (15.2 to 64.6)   | 89.5 (86.9 to 91.8)  | 3.58 (1.83 to 7.01)                | 0.70 (0.48 to 1.02)                |

\*Unable to calculate confidence interval

**Figure S1: Flow of patients through the study**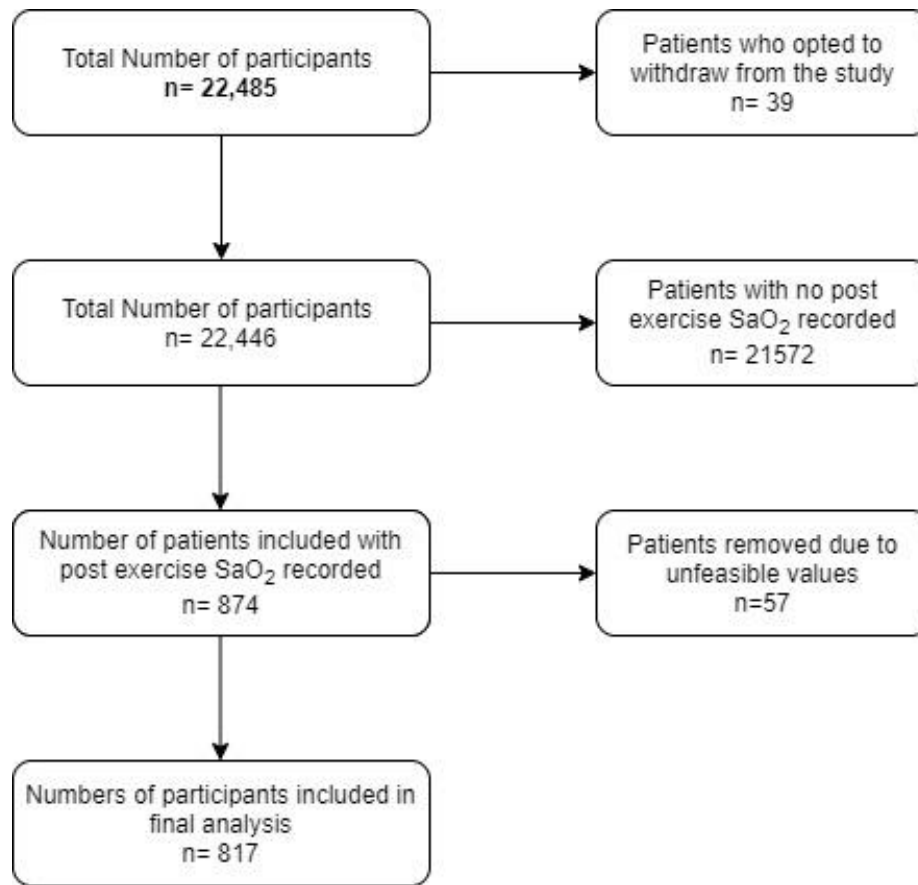

**Figure S2: Histograms comparing baseline oxygen saturation between patients with and without adverse outcome (N=813)**

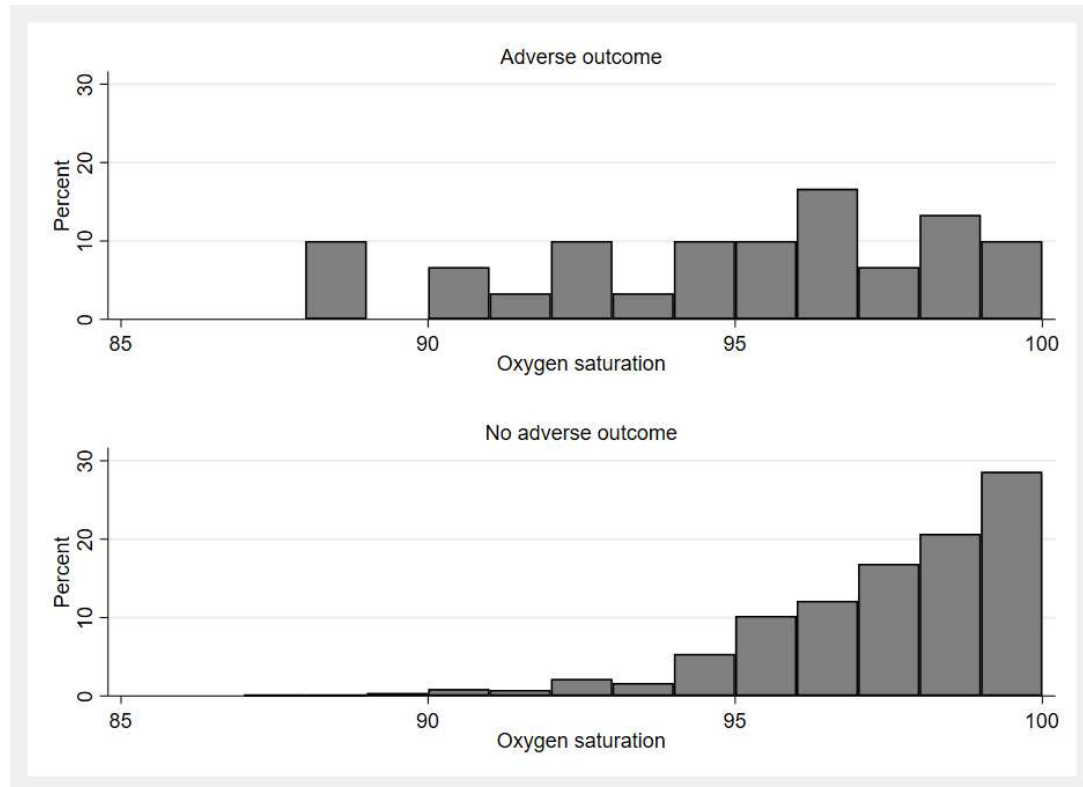



**Figure S3: Histograms comparing post-exertion oxygen saturation between patients with and without adverse outcome (N=817)**

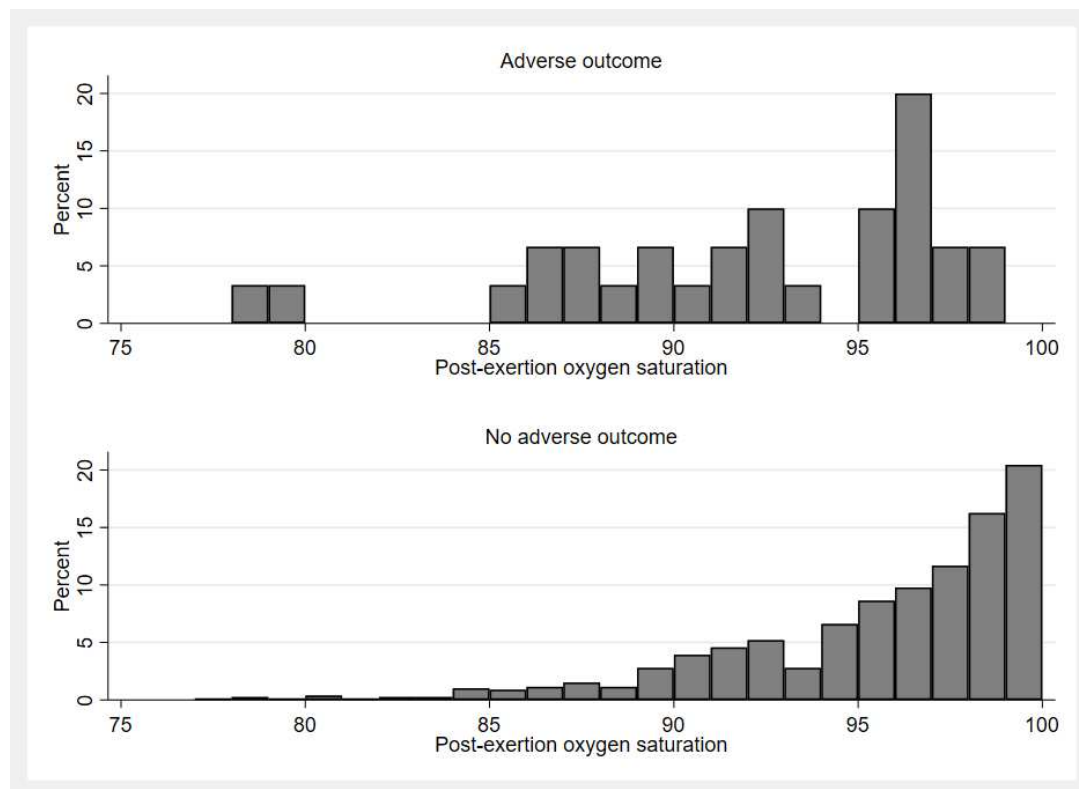

Supplement: inline-supplementary-material-1 [file inline-supplementary-material-1.pdf]
